# Supplementary material for: Slow excited state injection and charge recombination at star-shaped ruthenium polypyridyl compounds—TiO2 interfaces
Source: Royal Society of Chemistry journal article supplement (doi:10.1039/c1cc11210d), 2011-01-01
Supplement: c1cc11210d.pdf [file c1cc11210d.pdf]

## Supplementary Information for:

# Slow Excited State Injection and Charge Recombination at Star-Shaped Ruthenium Polypyridyl Compounds - TiO<sub>2</sub> Interfaces

Patrik G Johansson,<sup>a</sup> Yongyi Zhang,<sup>b</sup> Maria Abrahamsson,<sup>a</sup> Gerald J Meyer,<sup>\*a</sup> and Elena Galoppini,<sup>\*b</sup>

### Synthesis and Characterization of Star Compounds

**Homoleptic ruthenium compound Star (1).** A flame-dried round bottom flask was charged with ruthenium tris(4,4'-dibromo-2,2'-bipyridine) (50 mg, MW 1333, 0.038 mmol), benzene (2.5 mL), diisopropylamine (2 mL), THF (4 mL), dimethyl 5-((4-ethynylphenyl) ethynyl) isophthalate (**17**, 180 mg, MW

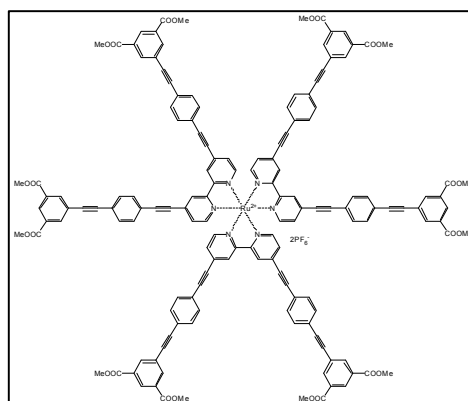

390, 0.460 mmol), and Pd(PPh<sub>3</sub>)<sub>4</sub> (5 mg, MW 1156, 0.004 mmol). The reaction mixture was stirred at 80°C under nitrogen atmosphere for 4 days and monitored with TLC. After it cooled to room temperature, the reaction mixture was filtered, and the solvent was removed *in vacuum*. The crude product was purified by silica gel column chromatography (acetonitrile:H<sub>2</sub>O = 85:15) to remove any unreacted starting material. The last band of silica gel was isolated, concentrated, and triturated with THF and acetone to give an orange-red powder (**Star** 30 mg, Mw 2757). Yield: 30%. <sup>1</sup>H NMR (THF)-*d*<sub>8</sub>: δ 8.92(s, 6H), δ 8.60 (broad, 6H), δ 8.36 (s, 12H), δ 8.04-8.06 (m, 6H), δ 7.67 (broad, 30H), δ 3.93 (s, 36H) ppm. MS (ESI) calcd for C<sub>150</sub>H<sub>96</sub>N<sub>6</sub>O<sub>24</sub>Ru<sup>2+</sup>: 2466.55. Found: 2466.58. The <sup>13</sup>C is not available due to the low solubility. IR-ATR (cm<sup>-1</sup>):

2956 ( $C-H_{Ar}$ ), 2858 ( $C-H_{CH_3}$ ), 2216 ( $C\equiv C$ ), 1724 ( $C=O$ ), 1600 ( $C=C_{Ar}$ ), 1508, 1459, 1438, 1378, 1351, 1247 ( $C-O$ ), 1120, 1070, 1039, 993, 912, 837 ( $C-H_{Ar}$ ).

### Homoleptic ruthenium compound **Star n—BuO**

**(2)**. Ru(DMSO)<sub>4</sub>(PF<sub>6</sub>)<sub>2</sub> (12 mg, MW 703, 0.017 mmol), Tetramethyl 5,5'-(((2,2'-bipyridine)-4,4'-diylbis(ethyne-2,1-diyl))bis(2,5-dibutoxy-4,1-phenylene))bis (ethyne-2,1-diyl)diisophthalate (63 mg, Mw 1077, 0.058 mmol), THF (4 mL), and nitrogen-purged 1-butanol (4 mL) were

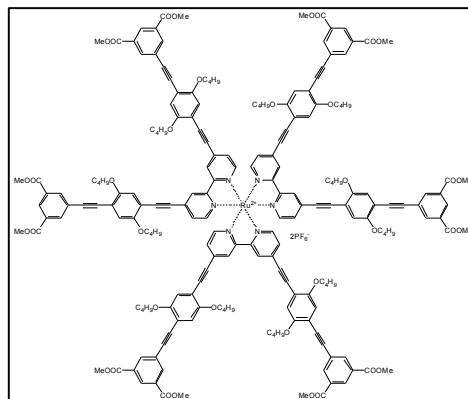

added into a round bottom flask, and the reaction mixture was heated to reflux under nitrogen atmosphere. Every 24 hours, the reaction mixture was monitored by UV-Vis spectroscopy until the reaction completed. The reaction mixture was cooled to room temperature and filtered. The crude product, a brown powder, was rinsed with acetone and filtered. The filtrate was condensed in vacuum and an orange-red powder (**Star nBuO (2)**, 20 mg, MW 3597) was precipitated by addition of hexane. Yield: 34%. <sup>1</sup>H NMR (acetone)-*d*<sub>6</sub>:  $\delta$  8.98-9.02 (broad, 6H),  $\delta$  8.56(s, 6H),  $\delta$  8.30(broad, 18H),  $\delta$  7.65-7.66 (broad, 6H),  $\delta$  7.35 (broad, 6H),  $\delta$  7.24-7.25 (broad, 6H),  $\delta$  4.14-4.18 (broad, 24H),  $\delta$  3.97 (s, 36H),  $\delta$  1.85-1.86 (m, 24H),  $\delta$  1.59-1.66 (m, 24H),  $\delta$  1.01-1.07 (m, 36H) ppm. <sup>13</sup>C NMR (acetone)-*d*<sub>6</sub>:  $\delta$  164.84, 157.02, 154.43, 153.91, 152.13, 135.67, 133.26, 131.57, 129.68, 129.10, 126.19, 124.26, 117.14, 117.02, 115.49, 112.09, 95.45, 93.33, 90.78, 87.61, 69.28, 69.07, 52.09, 31.31, 31.14, 19.19, 19.05, 13.32, 13.28. MS (ESI) calcd for C<sub>198</sub>H<sub>192</sub>N<sub>6</sub>O<sub>36</sub>Ru<sup>2+</sup>: 3331.24. Found: 3331.27. IR-ATR (cm<sup>-1</sup>): 2956 ( $C-H_{Ar}$ ), 2873 ( $C-H_{CH_3}$ ), 2208 ( $C\equiv C$ ), 1728 ( $C=O$ ), 1605 ( $C=C_{Ar}$ ), 1502, 1438, 1411, 1382, 1355, 1326, 1245 ( $C-O$ ), 1138, 1120, 1105, 1064, 1024, 1002, 9912, 839 ( $C-H_{Ar}$ ).
